# Supplementary material for: Microbial Metabolic Redundancy Is a Key Mechanism in a Sulfur-Rich Glacial Ecosystem
Source: PubMed Central journal article supplement (PMC7406229; doi:10.1128/msystems.00504-20), 2020-08-04

Supplementary Material – Figure S1. BFP16 Spring location.

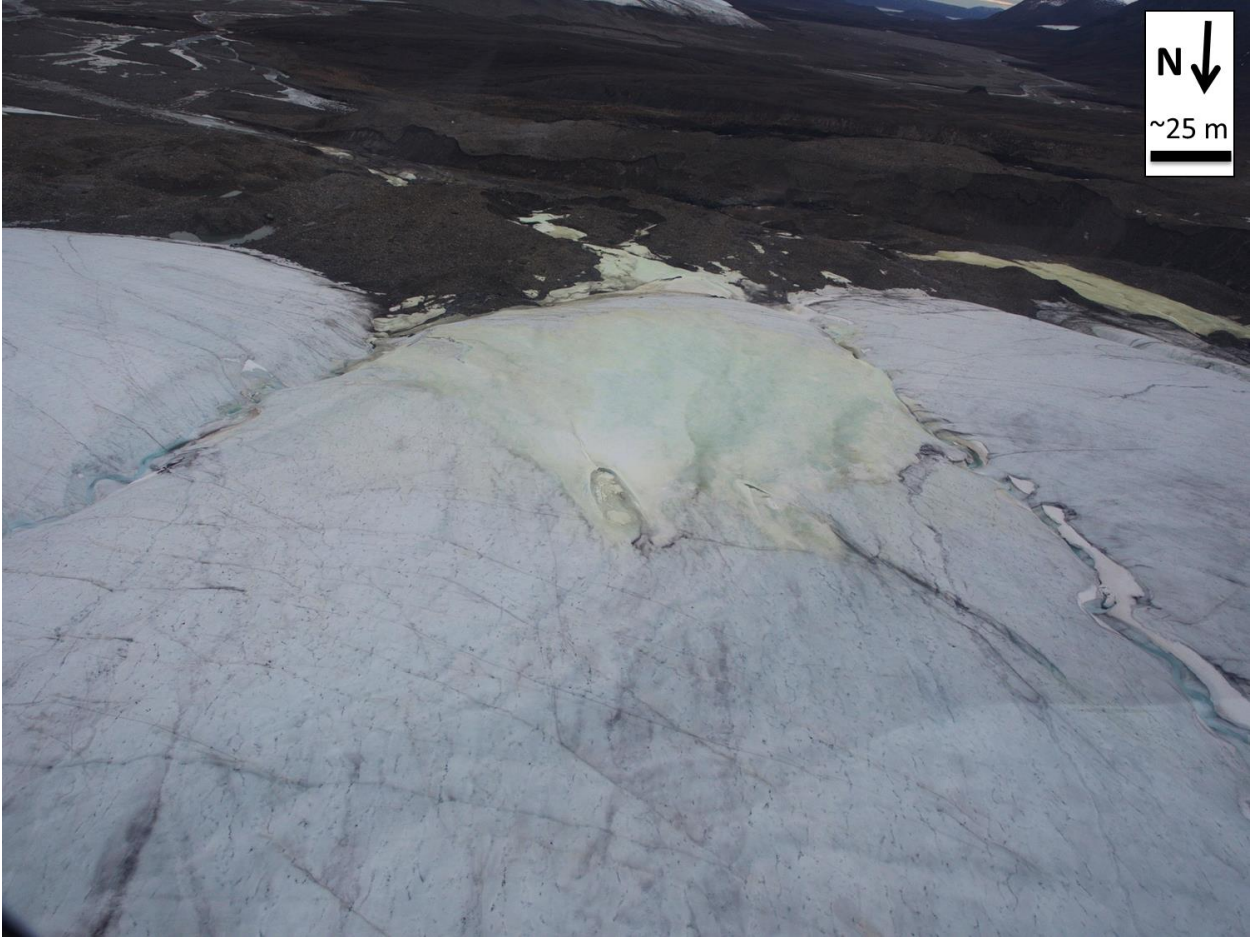

Supplement: mSystems.00504-20-sf001.pdf [file mSystems.00504-20-sf001.pdf]
